# Supplementary material
Source: Springer Nature journal article supplement (https://www.springermedizin.de/resource/supplementary/12955_2011_922_MOESM3_ESM.pdf/9558716)

A

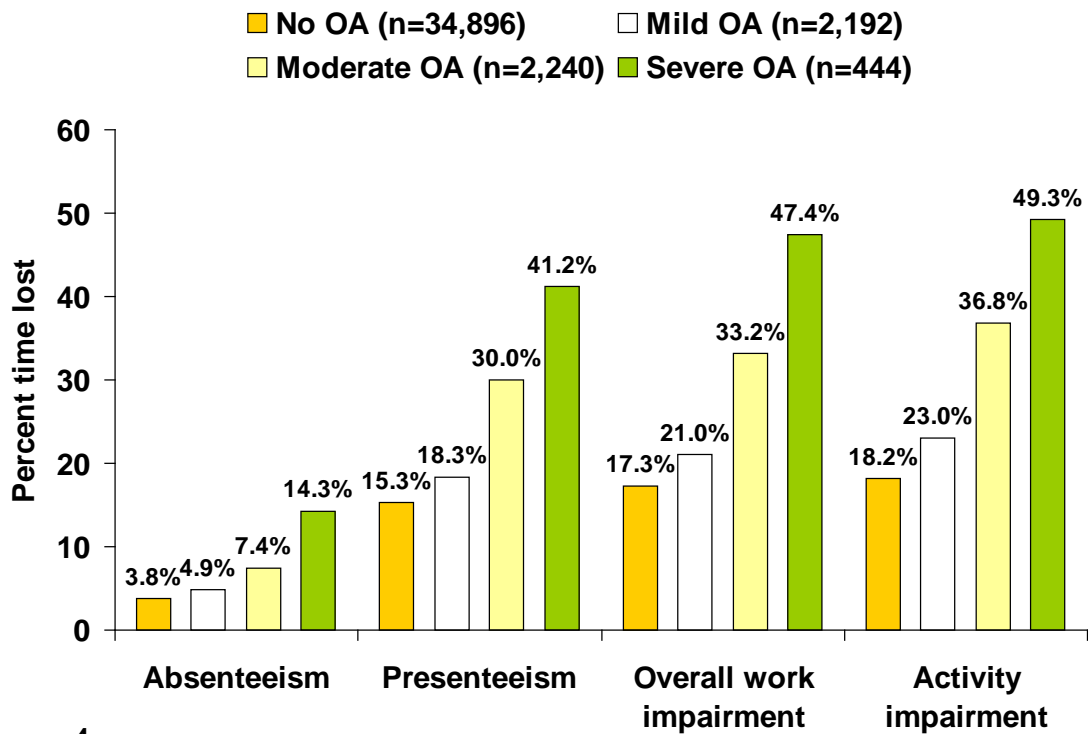

B

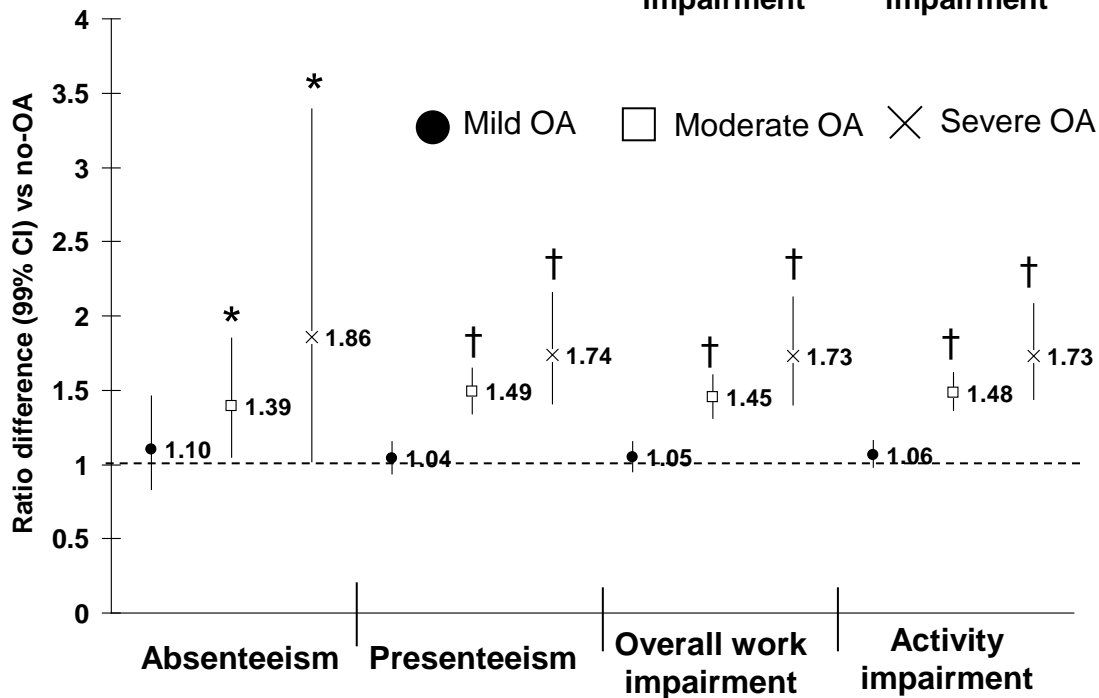

Supplement: MOESM3 [file 9558716]
